# Supplementary material for: Declining comorbidity-adjusted mortality rates in English patients receiving maintenance renal replacement therapy
Source: PubMed Central journal article supplement (PMC5912929; doi:10.1016/j.kint.2017.11.020), 2018-05
Supplement: mmc2.pdf [file mmc2.pdf]

**Supplemental table 1: Number of kidney transplant operations in England recorded in all-England Hospital Episode Statistics and the UK Transplant Registry†, by month and year**

| Month           | 2000  |      | 2001 |       | 2002 |       | 2003 |       | 2004 |       | 2005 |       | 2006 |      | 2007 |      | 2008 |      | 2009 |      | 2010 |      | 2011 |      | 2000-2011    |              |
|-----------------|-------|------|------|-------|------|-------|------|-------|------|-------|------|-------|------|------|------|------|------|------|------|------|------|------|------|------|--------------|--------------|
|                 | HES   | UKTR | HES  | UKTR  | HES  | UKTR  | HES  | UKTR  | HES  | UKTR  | HES  | UKTR  | HES  | UKTR | HES  | UKTR | HES  | UKTR | HES  | UKTR | HES  | UKTR | HES  | UKTR | HES          | UKTR         |
| Jan             | 99    | 104  | 100  | 119   | 120  | 129   | 140  | 145   | 130  | 147   | 100  | 104   | 109  | 108  | 145  | 136  | 164  | 157  | 178  | 169  | 213  | 208  | 191  | 185  |              |              |
| Feb             | 93    | 102  | 89   | 95    | 70   | 81    | 99   | 103   | 144  | 155   | 97   | 101   | 136  | 145  | 103  | 131  | 145  | 145  | 161  | 153  | 176  | 166  | 182  | 178  |              |              |
| Mar             | 134   | 154  | 120  | 128   | 87   | 99    | 104  | 113   | 130  | 145   | 114  | 118   | 118  | 132  | 143  | 146  | 152  | 150  | 173  | 170  | 183  | 197  | 170  | 174  |              |              |
| Apr             | 99    | 106  | 88   | 96    | 94   | 97    | 97   | 100   | 119  | 127   | 141  | 140   | 126  | 123  | 129  | 126  | 165  | 166  | 166  | 157  | 175  | 171  | 161  | 154  |              |              |
| May             | 102   | 109  | 130  | 144   | 107  | 107   | 105  | 117   | 126  | 129   | 139  | 143   | 152  | 150  | 159  | 153  | 166  | 161  | 180  | 178  | 167  | 171  | 191  | 185  |              |              |
| Jun             | 113   | 124  | 102  | 105   | 112  | 124   | 111  | 125   | 109  | 107   | 138  | 138   | 143  | 149  | 149  | 143  | 144  | 142  | 178  | 171  | 191  | 186  | 171  | 166  |              |              |
| Jul             | 99    | 104  | 120  | 136   | 110  | 113   | 105  | 112   | 113  | 121   | 141  | 143   | 140  | 137  | 158  | 156  | 183  | 186  | 186  | 182  | 181  | 172  | 203  | 204  |              |              |
| Aug             | 104   | 114  | 112  | 124   | 104  | 112   | 98   | 113   | 115  | 108   | 115  | 111   | 136  | 133  | 145  | 137  | 149  | 148  | 169  | 168  | 162  | 155  | 175  | 170  |              |              |
| Sep             | 81    | 88   | 98   | 104   | 124  | 129   | 151  | 147   | 111  | 122   | 126  | 131   | 159  | 157  | 131  | 133  | 176  | 178  | 169  | 167  | 162  | 166  | 194  | 197  |              |              |
| Oct             | 100   | 120  | 125  | 137   | 149  | 156   | 111  | 121   | 145  | 145   | 132  | 127   | 142  | 138  | 154  | 144  | 211  | 208  | 210  | 206  | 193  | 193  | 194  | 187  |              |              |
| Nov             | 121   | 129  | 107  | 117   | 152  | 158   | 119  | 127   | 114  | 119   | 109  | 114   | 161  | 156  | 165  | 167  | 171  | 176  | 194  | 196  | 221  | 217  | 199  | 195  |              |              |
| Dec             | 113   | 127  | 98   | 108   | 113  | 121   | 98   | 109   | 141  | 141   | 138  | 139   | 158  | 148  | 157  | 151  | 168  | 166  | 187  | 178  | 186  | 186  | 200  | 192  |              |              |
| <b>Total</b>    | 1258  | 1381 | 1289 | 1413  | 1342 | 1426  | 1338 | 1432  | 1497 | 1566  | 1490 | 1509  | 1680 | 1676 | 1768 | 1723 | 1994 | 1983 | 2151 | 2095 | 2210 | 2188 | 2231 | 2187 | <b>20248</b> | <b>20579</b> |
| <b>Absolute</b> | -123  |      |      | -124  |      | -84   |      | -94   |      | -69   |      | -19   |      | 4    |      | 45   |      | 11   |      | 56   |      | 22   |      | 44   |              | <b>-331</b>  |
| <b>%</b>        | -8.9% |      |      | -8.8% |      | -5.9% |      | -6.6% |      | -4.4% |      | -1.3% |      | 0.2% |      | 2.6% |      | 0.6% |      | 2.7% |      | 1.0% |      | 2.0% |              | <b>-1.6%</b> |

HES = Hospital Episode Statistics. UKTR = UK Transplant Registry. Multi-visceral organ transplants excluded. †Incorporated into National Health Service Blood and Transplant (NHSBT) [<http://www.nhsbt.nhs.uk/>]. The codes used to identify kidneys transplants in all-England Hospital Episode Statistics M012, M013, M014, M015, M018 and M019 (OPCS-4).
