# Supplementary material for: Declining comorbidity-adjusted mortality rates in English patients receiving maintenance renal replacement therapy
Source: PubMed Central journal article supplement (PMC5912929; doi:10.1016/j.kint.2017.11.020), 2018-05
Supplement: mmc3.pdf [file mmc3.pdf]

**Supplemental table 2: Baseline characteristics of all-England adults being treated for end-stage renal disease, recorded in all-England Hospital Episode Statistics and the UK Renal Registry by year**

|                                            | Year Groups |       |       |       |       |       |       |       |
|--------------------------------------------|-------------|-------|-------|-------|-------|-------|-------|-------|
|                                            | 2007        |       | 2008  |       | 2009  |       | 2010  |       |
|                                            | HES         | UK-RR | HES   | UK-RR | HES   | UK-RR | HES   | UK-RR |
| <b>Number of incident RRT patients*</b>    | 5,412       | 5,483 | 5,420 | 5,626 | 5,572 | 5,690 | 5,501 | 5,541 |
| <b>Demographics</b>                        |             |       |       |       |       |       |       |       |
| Female                                     | 38%         | 38%   | 39%   | 39%   | 39%   | 38%   | 38%   | 37%   |
| Median age† (years)                        | 63          | 64    | 63    | 64    | 63    | 64    | 64    | 64    |
| Ethnicity‡                                 |             |       |       |       |       |       |       |       |
| <i>Proportion with ethnicity reported</i>  | 94%         | 75%   | 94%   | 74%   | 95%   | 78%   | 95%   | 94%   |
| White                                      | 76%         | 78%   | 76%   | 78%   | 76%   | 80%   | 77%   | 78%   |
| Black                                      | 7%          | 8%    | 7%    | 7%    | 7%    | 8%    | 6%    | 7%    |
| Asian                                      | 8%          | 11%   | 9%    | 11%   | 9%    | 10%   | 8%    | 12%   |
| Others                                     | 4%          | 3%    | 4%    | 3%    | 4%    | 3%    | 4%    | 2%    |
| <b>Renal characteristics</b>               |             |       |       |       |       |       |       |       |
| Initial renal replacement therapy modality |             |       |       |       |       |       |       |       |
| Dialysis                                   | 92%         | 95%   | 91%   | 94%   | 91%   | 94%   | 90%   | 93%   |
| Transplant                                 | 8%          | 5%    | 9%    | 6%    | 9%    | 6%    | 10%   | 7%    |
| Primary renal diagnosis                    |             |       |       |       |       |       |       |       |
| Diabetic kidney disease                    | 20%         | 20%   | 20%   | 21%   | 19%   | 22%   | 17%   | 21%   |
| Glomerulonephritis                         | 14%         | 10%   | 15%   | 11%   | 17%   | 11%   | 23%   | 11%   |
| Polycystic kidney disease                  | 9%          | 6%    | 9%    | 7%    | 8%    | 6%    | 8%    | 6%    |
| Other known diagnosis/unknown/unavailable  | 57%         | 64%   | 56%   | 61%   | 56%   | 61%   | 52%   | 62%   |

Date are n or % or median. HES = Hospital Episode Statistics (all-England). UK-RR = UK Renal Registry. Only years with >99% of renal units providing data to UK-RR presented [<https://www.renalreg.org/publications-reports/>]. \*Most recently reported data are presented. †UK-RR 2007 data were derived from England and Wales only. UK-RR 2008-2010 data were from England only. ‡Ethnicity derived from Hospital Episode Statistics used more categories.
