# Supplementary material for: Declining comorbidity-adjusted mortality rates in English patients receiving maintenance renal replacement therapy
Source: PubMed Central journal article supplement (PMC5912929; doi:10.1016/j.kint.2017.11.020), 2018-05
Supplement: mmc6.pdf [file mmc6.pdf]

## Supplemental table 5: Coding of comorbidity by A) International Classification of Disease (ICD) diagnoses and Office of Population Censuses and Surveys (OPCS) procedures

### A) Diagnostic codes

|                             | ICD-10                                                                                    | ICD-9                                      | ICD-8                       | ICD-7                        |
|-----------------------------|-------------------------------------------------------------------------------------------|--------------------------------------------|-----------------------------|------------------------------|
| <b>Diabetes</b>             | E10:E14                                                                                   | 250                                        | 250                         | 260                          |
| <b>Vascular</b>             |                                                                                           |                                            |                             |                              |
| Major coronary disease      | I21:I23, I25.2, I25.6                                                                     | 410, 412, 414.8                            | 410, 412                    | 420                          |
| Congestive heart failure    | I42:I43, I50, I11.0, I13.0, I13.2, I25.5, P29.0                                           | 402, 404, 425, 428                         | 402, 404, 425, 427          | 434                          |
| Cerebrovascular disease     | I60:69, G45, G46, H34.0                                                                   | 430:431, 434:436, 438, 432.0, 432.1        | 430:431, 433:436            | 330:334                      |
| Peripheral vascular disease | I70:I74, K55.0, K55.1, K55.8, K55.9, R02, Z95.8, Z95.9, E10.5, E11.5, E12.5, E13.5, E14.5 | 440:444, 250.6                             | 440:445                     | 450:454                      |
| <b>Non-Vascular</b>         |                                                                                           |                                            |                             |                              |
| Liver                       | B18, K70:K76, I85, I86.4, I98.2                                                           | 570:573                                    | 571, 573                    | 581                          |
| Cancer                      | C00:C97                                                                                   | 140:208, V10                               | 140:239                     | 140:239                      |
| COPD*                       | J41:J47, J60:J67, J68.4, J70.1, J70.3, J84, I27.8, I27.9                                  | 416.8, 416.9, 491:496, 500:506, 515, 508.1 | 490:493, 515:518            | 241, 501:502, 523:526, 527.1 |
| Peptic ulcer disease        | K25:K28                                                                                   | 531:534, 530.3                             | 531:534                     | 540:542                      |
| Hemi- or paraplegia         | G81:G83, G04.1, G11.4, G80.1, G80.2                                                       | 342:344                                    | 343:344                     | 351:352                      |
| Connective tissue disease   | M05: M06, M30:M36                                                                         | 517, 710, 714, 446.0, 446.4, 446.7, 447.6  | 712, 716, 734, 695.4, 696.0 | 722                          |

### B) Procedural codes

|                                          | OPCS-4                                                                                                                                      | OPCS-3                                                                                 | OPCS-2             | OPCS-1  |
|------------------------------------------|---------------------------------------------------------------------------------------------------------------------------------------------|----------------------------------------------------------------------------------------|--------------------|---------|
| <b>Vascular</b>                          |                                                                                                                                             |                                                                                        |                    |         |
| Major coronary disease <sup>†</sup>      | K40:K47, K49, K50, K75                                                                                                                      | 304.1, 304.3                                                                           | 304.1, 304.2       | 312     |
| Peripheral vascular disease <sup>‡</sup> | X07:X12, J10.4, K33, L04, L12:L13, L16, L18:L21, L25:L31, L33:L35, L37:L39, L41:L54, L56:L60, L62:L63, L65:L66, L68:L71, L76, L89, L97, O20 | 304, 320:321, 325, 552, 822:826, 861:866, 870:871, 873:875, 878, 880:884, 887:888, 890 | 860:875, 884, 8811 | 880:886 |

\*COPD=chronic obstructive pulmonary disease

<sup>†</sup>Includes codes for coronary artery bypass surgery or percutaneous coronary interventions (angioplasty +/- stent)

<sup>‡</sup>Includes codes for (non-traumatic) limb amputations and non-coronary arterial interventions
