# Supplementary material for: Declining comorbidity-adjusted mortality rates in English patients receiving maintenance renal replacement therapy
Source: PubMed Central journal article supplement (PMC5912929; doi:10.1016/j.kint.2017.11.020), 2018-05
Supplement: mmc7.pdf [file mmc7.pdf]

## Supplemental table 6: Baseline characteristics of end-stage renal disease populations used for standardization

|                      | 1970 - 2008 'average' RRT population | 2003 - 2008 RRT population |
|----------------------|--------------------------------------|----------------------------|
| N                    | 3,242                                | 29,552                     |
| <b>Demographics</b>  |                                      |                            |
| Female               | 39.1%                                | 38.2%                      |
| Median age (years)   | 55 (42-68)                           | 62 (48-73)                 |
| 18 - 40              | 22.0%                                | 13.8%                      |
| 40 - 50              | 16.9%                                | 13.2%                      |
| 50 - 60              | 19.9%                                | 16.9%                      |
| 60 - 70              | 20.4%                                | 22.8%                      |
| 70 - 80              | 17.0%                                | 24.3%                      |
| ≥80                  | 3.9%                                 | 9.0%                       |
| <b>Comorbidities</b> |                                      |                            |
| Diabetes             | 17.8%                                | 32.3%                      |
| Vascular             | 17.8%                                | 27.5%                      |
| Non-vascular         | 15.7%                                | 26.3%                      |

Excludes patients dying within 90 days. Data are n or % or median (IQR). RRT = Renal replacement therapy.
