# Supplementary material for: Declining comorbidity-adjusted mortality rates in English patients receiving maintenance renal replacement therapy
Source: PubMed Central journal article supplement (PMC5912929; doi:10.1016/j.kint.2017.11.020), 2018-05
Supplement: mmc8.pdf [file mmc8.pdf]

**Supplemental Table 7: Diagnostic and procedural codes used to identify general population controls**

| <b>Diagnoses</b>                  | <b>ICD-10</b>                                    | <b>ICD-9</b>     | <b>ICD-8</b>      | <b>ICD-7</b>       |
|-----------------------------------|--------------------------------------------------|------------------|-------------------|--------------------|
| <b>Ophthalmic</b>                 |                                                  |                  |                   |                    |
| Squint                            | H49:H51                                          | 378              | 373               | 384                |
| Cataract                          | H25                                              | 366              | 374               | 385                |
| <b>General surgical</b>           |                                                  |                  |                   |                    |
| Gallbladder disease               | K80:K81                                          | 574:575          | 574:575           | 584:585            |
| Hernia                            | K40                                              | 550              | 550               | 560:561            |
| Varicose veins                    | I84                                              | 455              | 455               | 461                |
| Haemorrhoids                      | I83                                              | 454              | 454               | 460                |
| <b>Otorhinolaryngology</b>        |                                                  |                  |                   |                    |
| Otitis externa/media              | H60:H67                                          | 380:382          | 380:382           | 390:392            |
| Nasal polyp/deflecting septum     | J33, J34.2                                       | 470:471          | 504:505           | 514:515            |
| <b>Injuries</b>                   |                                                  |                  |                   |                    |
| Limb fractures                    | S42, S52, S62, S82, S92                          | 810:816, 823:826 | 810:816, 823:826, | 810:816, 823:826,  |
| Dislocations sprains and strains  | S03, S13, S23, S33, S43, S53, S63, S73, S83, S93 | 830:839, 840:848 | 830:839, 840:848, | 830:839, 840: 848, |
| Head injury                       | S06                                              | 850:854          | 850:854,          | 852:856            |
| Superficial injury and contusion  | S00, S10, S20, S30, S40, S50, S60, S70, S80, S90 | 910:919, 920:924 | 910:918, 920:929  | 910:918, 920:929   |
| <b>Miscellaneous</b>              |                                                  |                  |                   |                    |
| Nail diseases                     | L60                                              | 703              | 703               | 712                |
| Sebaceous cyst                    | L72.1                                            | 7062             | 7062              | 7142               |
| Knee-internal derangement         | M23                                              | 717              | 724               | 734                |
| Bunion                            | M20.1                                            | 7271             | 730               | 740                |
| Contraception management          | Z30                                              | V25              | Y43               | -                  |
| Upper respiratory tract infection | J00:J06                                          | 460:466          | 460:466           | 470:475            |
| Teeth disorders                   | K00:K03                                          | 520:521          | 520:521           | 530:535            |

| <b>Procedures/Operations</b> | <b>OPCS-4</b> | <b>OPCS-3</b> | <b>OPCS-2</b> | <b>OPCS-1</b> |
|------------------------------|---------------|---------------|---------------|---------------|
| Appendectomy                 | H01:H03       | 441:444       | 441:444       | 441           |
| Dilation and curettage       | Q10.3:Q11.4   | 703:704       | 703:704       | 731:732       |
| Total hip replacement        | Y37:Y39       | 810           | 810           | -             |
| Total knee replacement       | Y40:Y42       | 812           | 812           | -             |
| Tonsillectomy/adenoidectomy  | E20, F34, F36 | 230:236       | 230:236       | 260:264       |

ICD=International Statistical Classification of Diseases and Related Health Problems. OPCS=Office of Population Censuses and Surveys Classification of Surgical Operations and Procedures.
