# Supplementary material for: Declining comorbidity-adjusted mortality rates in English patients receiving maintenance renal replacement therapy
Source: PubMed Central journal article supplement (PMC5912929; doi:10.1016/j.kint.2017.11.020), 2018-05
Supplement: mmc10.pdf [file mmc10.pdf]

## Supplemental figure 2: Baseline characteristics of new treated end-stage renal disease patients, by year

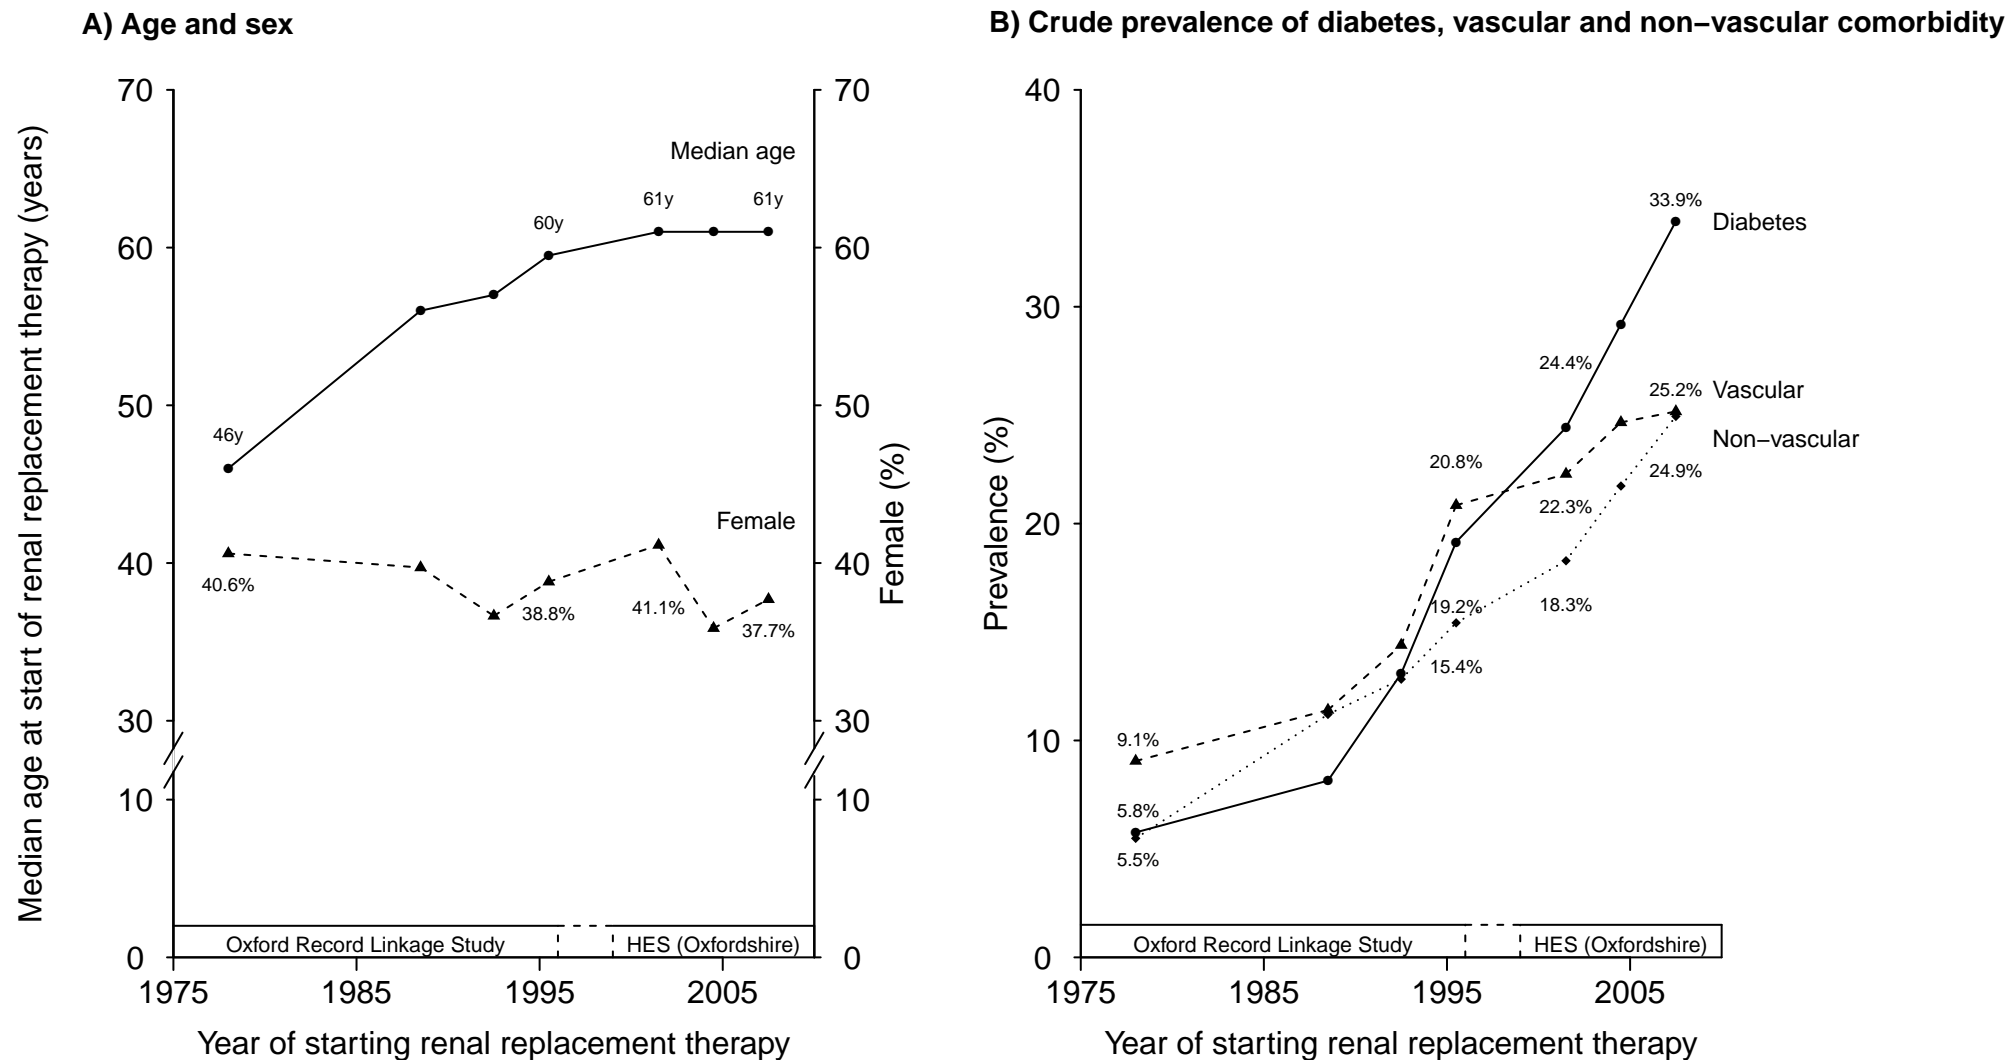

Excludes patients dying within 90 days. HES = Hospital Episode Statistics (Oxfordshire). Results are plotted at midpoint for each year group. For this figure, the Oxford Record Linkage Study includes 4 year groups (1970–85, 1986–90, 1991–93, 1994–96).
