# Supplementary material for: Declining comorbidity-adjusted mortality rates in English patients receiving maintenance renal replacement therapy
Source: PubMed Central journal article supplement (PMC5912929; doi:10.1016/j.kint.2017.11.020), 2018-05
Supplement: mmc12.pdf [file mmc12.pdf]

## Supplemental figure 4: Standardized one- to five-year survival probabilities in new treated end-stage renal disease patients

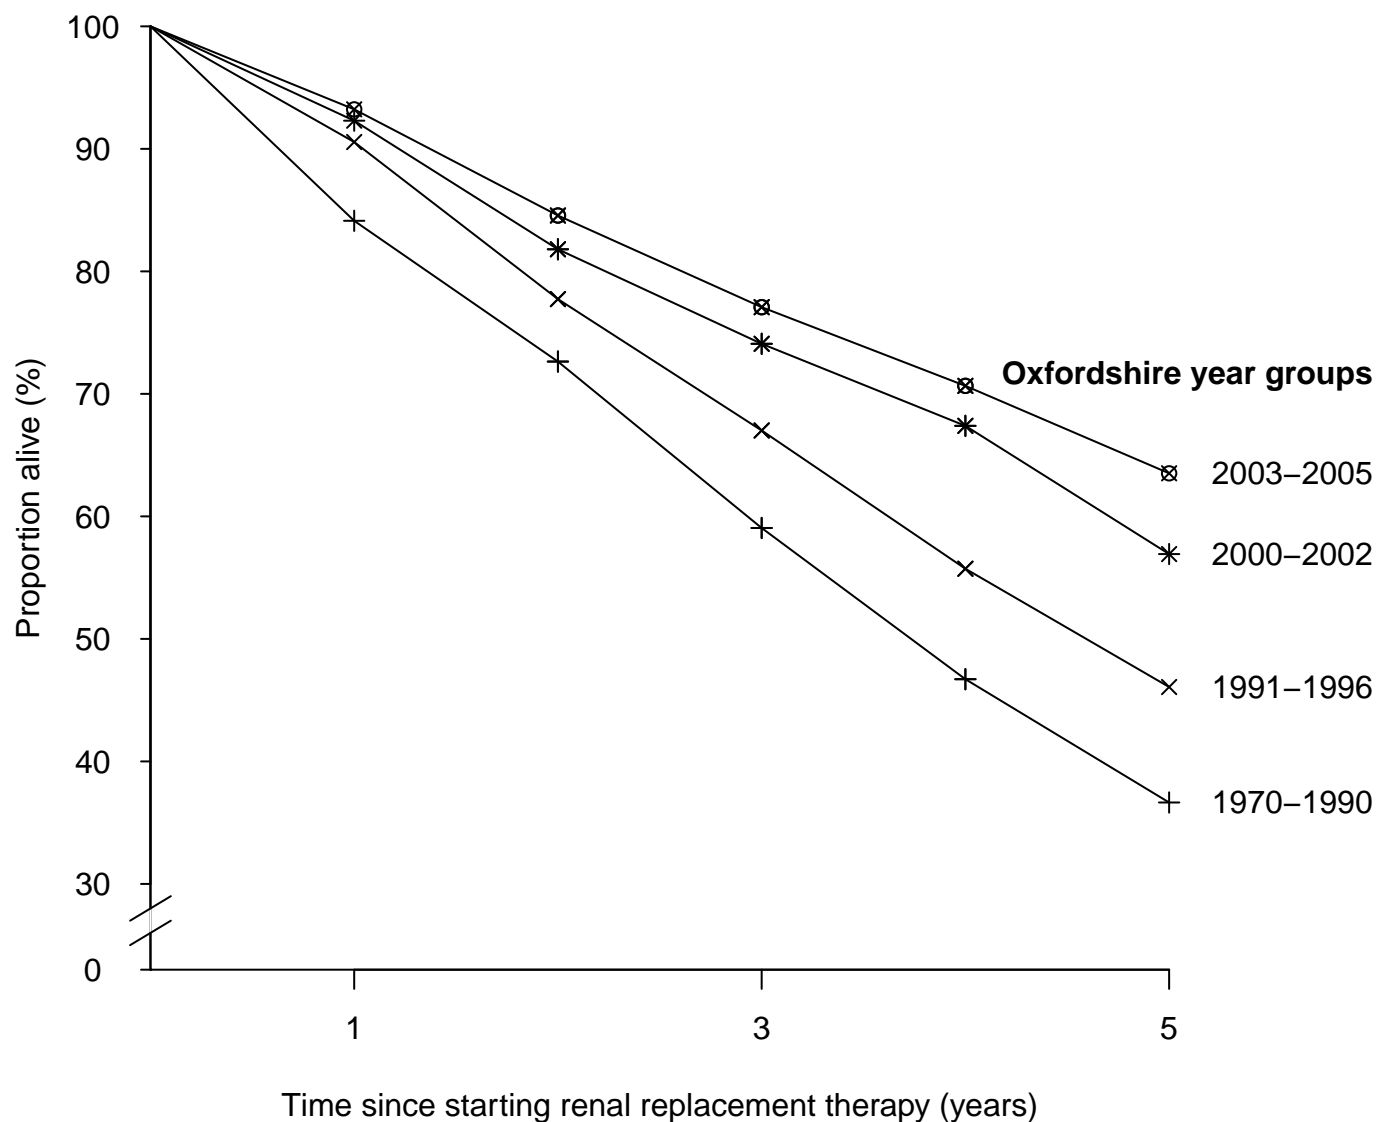

### Oxfordshire year groups

|                    |                     |                     |                     |
|--------------------|---------------------|---------------------|---------------------|
| <b>2003-2005 †</b> | 93.2% (91.6%-94.9%) | 77.1% (73.9%-80.2%) | 63.5% (59.4%-67.7%) |
| <b>2000-2002 †</b> | 92.3% (90.4%-94.2%) | 74.1% (70.3%-77.9%) | 56.9% (51.9%-61.9%) |
| <b>1991-1996 *</b> | 90.6% (88.6%-92.5%) | 67.0% (63.1%-70.9%) | 46.1% (40.9%-51.2%) |
| <b>1970-1990 *</b> | 84.1% (80.9%-87.4%) | 59.1% (53.6%-64.5%) | 36.6% (29.8%-43.5%) |

Survival probabilities are 100 minus the adjusted mortality rates, standardized by age, sex and comorbidities to an 'average' 1970-2008 renal replacement therapy population (see Supplemental Table 6 for characteristics). Excludes patients dying within 90 days. 95% confidence intervals included in parentheses. \*Oxford Record Linkage Study. † Hospital Episode Statistics (Oxfordshire).
